# Supplementary material for: What Do Trade Allowances Look Like? Evidence from Actual Payments to a Big-Box Retailer
Source: Atypon-hosted journal article supplement (doi:10.1287/mnsc.2022.00817), 2025-12-24
Supplement: mnsc.2022.00817.sm1.pdf [file mnsc.2022.00817.sm1.pdf]

# Appendix (For Online Publication)

## A. Data Processing

### A.1. Data Sources

**A.1.1. Primary Supplier-Category Allowance Data** The retailer maintains records of the allowance payments made by all its suppliers to the two supermarket chains included in our analysis. Each observation corresponds to a payment made by a supplier in a given product category of a given supermarket chain and includes the specific day when the payment was made. The panel includes payments made between July 2010 and August 2012. Trade allowances are grouped in this data set into the following five groups: 1) Slotting, placement and other fees; 2) Logistics fees; 3) New store opening fees; 4) Unsaleables fees and 5) Allowances negotiated in spot contracts.

**A.1.2. Scandata** This dataset contains scandata including retail prices, wholesale costs and quantities at the SKU-store level for the two supermarket chains included in our analysis. The panel covers the period from week 32 of 2010 to week 32 of 2012. Each SKU is identified by its barcode (EAN-13) and also by a unique identifier used by the retailer. There are nearly 150,000 SKUs in more than 200 supermarket stores in the data.

**A.1.3. Product Master Record** For each SKU identified both by its barcode (EAN-13) and the retailer internal unique identifier this dataset includes the category and section to which the SKU belongs to and the supplier that supplies the SKU. In addition, it includes the date when the SKU was added to the system for the first time, the SKU's brand name and whether it is a private label or not.

### A.2. Data Preparation

We integrated the primary allowance data and the scandata using the supplier-SKU mapping provided by the product master record. Before merging the two datasets we aggregated data at the semi-annual level and removed some mismeasured values (e.g., negative prices and quantities) and removed outliers. We further removed some minor categories including seasonal products such as christmas decoration.

## B. Further Details on the Data

**Product Departments:** The Department-level (Allowance) Data (dataset II in Table 3) include the following eight departments: Frozen Foods, Groceries, Non Food, Non Perishables, Perishables, Pharmacy, Textiles and All Departments.

**Product Categories:** Our analysis based on the Primary Supplier-Category (Allowance) Data and the Scandata (datasets I and III in Table 3, respectively) include the 175 product categories listed in Table B.1.

The retailer determines category definitions on the basis of proximity on supermarket shelves. In our analysis, we excluded 13 out of the initial 188 categories which were either not closely related to the retailer's main business (e.g., "restaurant", "prepared meals"), were seasonal in nature (e.g., "Christmas decoration"), or were poorly defined (e.g., "gift cases") or were economically irrelevant (e.g., "seeds"). The 10 excluded categories are: *Christmas Decoration, Own Pastries, Gift Cases, Pasta Making, Pre-Wash, Pre-payments, Restaurant, Prepared Meals, Cards, Special Seasons, Photography, Telephony, and Seeds.*

**Table B.1 Product Categories Included in the Analysis**

|    |                       |    |                              |     |                         |     |                         |
|----|-----------------------|----|------------------------------|-----|-------------------------|-----|-------------------------|
| 1  | Pet accessories       | 46 | Coloring                     | 91  | Eggs                    | 136 | Child perfumes          |
| 2  | Computing accessories | 47 | Ethnic foods                 | 92  | Home insecticides       | 137 | Frozen seafood          |
| 3  | Bikes accessories     | 48 | Prepared meals - Frozen      | 93  | Baby nighttime          | 138 | Fresh seafood           |
| 4  | Bathroom accessories  | 49 | Washing complements          | 94  | Men nighttime           | 139 | Batteries               |
| 5  | Baby accessories      | 50 | Spices                       | 95  | Women nighttime         | 140 | Candles and matches     |
| 6  | Hair accessories      | 51 | Canned pate                  | 96  | Children nighttime      | 141 | Swimming pools          |
| 7  | Men accessories       | 52 | Canned fruits and vegetables | 97  | Soap                    | 142 | Local spirits           |
| 8  | Women accessories     | 53 | Canned seafood               | 98  | Garden                  | 143 | Pesticides              |
| 9  | Child Accessories     | 54 | Party items                  | 99  | Fresh juices            | 144 | Chicken                 |
| 10 | Cooking oil           | 55 | Creams                       | 100 | Toys                    | 145 | Desserts                |
| 11 | Mineral waters        | 56 | Body care                    | 101 | Dish-washing detergents | 146 | First aid               |
| 12 | Dog food              | 57 | Facial care                  | 102 | Milk powder             | 147 | Paper products          |
| 13 | Cat food              | 58 | Men care                     | 103 | Milk UHT                | 148 | Solar protection        |
| 14 | Home ambience         | 59 | Hair removal                 | 104 | Legumes                 | 149 | Instant mashed potatoes |
| 15 | Electric bulbs        | 60 | Sports                       | 105 | Yeast                   | 150 | Cheeses                 |
| 16 | Sanitary sands        | 61 | Milk derivatives             | 106 | Office supplies         | 151 | Powder drinks           |
| 17 | Rice                  | 62 | Desktop-Notebook             | 107 | Liquors                 | 152 | Pastries                |
| 18 | Kitchen cleaning      | 63 | Deodorants                   | 108 | Toilet cleaners         | 153 | Milk flavoring          |
| 19 | Manual cleaning       | 64 | Laundry detergents           | 109 | Home cleaners           | 154 | Salt                    |
| 20 | Audio-Video           | 65 | Sweeteners                   | 110 | Footwear cleaners       | 155 | Dressings and sauces    |
| 21 | Automotive            | 66 | Home electronics             | 111 | Tomato sauces           | 156 | Health                  |
| 22 | Oat-meals             | 67 | Cold cuts                    | 112 | Manicure-pedicure       | 157 | Paper napkins           |
| 23 | Sugar                 | 68 | School                       | 113 | Milk candy              | 158 | Snacks                  |
| 24 | Functional drinks     | 69 | Pharmacy                     | 114 | Lard                    | 159 | Dog snacks              |
| 25 | Soft drinks           | 70 | Hardware                     | 115 | Butter                  | 160 | Soups                   |
| 26 | Isotonic drinks       | 71 | Auto Hardware                | 116 | Makeup                  | 161 | Hair styling            |
| 27 | Bikes                 | 72 | Delicatessen                 | 117 | Margarine               | 162 | Clothing smoothers      |
| 28 | Biscuits              | 73 | Pasta                        | 118 | Medicines               | 163 | Supplements             |
| 29 | Trash bags            | 74 | Perfumes                     | 119 | Kitchenware             | 164 | Cards                   |
| 30 | Coffee                | 75 | Frozen fruits                | 120 | Jam and honey           | 165 | Tea                     |
| 31 | Socks                 | 76 | Dried fruit                  | 121 | Furniture               | 166 | Home textiles           |
| 32 | Heat                  | 77 | Fruits and vegetables        | 122 | Fruit juice             | 167 | Paper towels            |
| 33 | Baby footwear         | 78 | Cookies                      | 123 | Child nutrition         | 168 | TV-LCD                  |
| 34 | Men footwear          | 79 | Candies                      | 124 | Other candies           | 169 | Ventilation             |
| 35 | Women footwear        | 80 | Frozen hamburgers            | 125 | Packaged bakery         | 170 | Frozen vegetables       |
| 36 | Children footwear     | 81 | Flour                        | 126 | Own bakery              | 171 | Baby clothing           |
| 37 | Camping and outdoors  | 82 | Ice-cream                    | 127 | Adult diapers           | 172 | Men clothing            |
| 38 | Meats                 | 83 | Ice                          | 128 | Baby diapers            | 173 | Women clothing          |
| 39 | Wax-scrubs            | 84 | Oral hygiene                 | 129 | Cloths                  | 174 | Children clothing       |
| 40 | Pork                  | 85 | Hair hygiene                 | 130 | Toilet paper            | 175 | Vinegar                 |
| 41 | Breakfast cereals     | 86 | Women hygiene                | 131 | Grill                   |     |                         |
| 42 | Beers                 | 87 | Hypochlorites                | 132 | Fresh pasta             |     |                         |
| 43 | Champagne             | 88 | Vegetables                   | 133 | Packaged pastries       |     |                         |
| 44 | Chocolates            | 89 | Wines                        | 134 | Natural products        |     |                         |
| 45 | Cigarettes            | 90 | Yogurts and desserts         | 135 | Films and music         |     |                         |

Notes: The table reports all categories included in the analysis.

## **C. Categories Requiring Refrigeration or Freezing Equipment**

**Categories requiring refrigeration:** Meats, Pork, Cold Cuts, Lard, Butter, Margarine, Fresh Pasta, Fresh Seafood, Chicken, Cheese, Yogurt and Desserts.

**Categories requiring freezing:** Prepared Meats - Frozen, Frozen Fruits, Frozen Hamburgers, Ice-Cream, Ice, Frozen Seafood, Frozen Vegetables.

## D. Introduction of New Products

**Table D.1 Allowances and Introduction of New Products**

|                | (1)                   | (2)                    |
|----------------|-----------------------|------------------------|
| New SKUs       | 0.0139***<br>(0.0022) | 0.0092***<br>(0.0021)  |
| Direct Import  |                       | -0.1010***<br>(0.0049) |
| Category FE    | ✓                     | ✓                      |
| Chain FE       | ✓                     | ✓                      |
| Time FE        | ✓                     | ✓                      |
| Number of obs. | 17,081                | 17,081                 |
| Adj. R-sq      | 0.2764                | 0.3441                 |
| Avg. FE        | 0.0892                | 0.0998                 |

*Notes:* OLS estimates of a regression equation in which the dependent variable is slotting & placement allowances as a share of gross wholesale revenue. *NewSKUs* is a dummy variable that takes the value of 1 if a supplier introduces at least an SKU in a given category, chain, and period. Cluster-robust (at the supplier level) standard errors in parenthesis. P-values notation: \*\*\*  $p < 0.01$ , \*\*  $p < 0.05$ , \*  $p < 0.1$ .

**Table D.2 Correlates of Allowances as a Share of Wholesale Revenue**

|                | (1)                  | (2)                   |
|----------------|----------------------|-----------------------|
| Groceries      | 0.0536**<br>(0.0043) | 0.0549**<br>(0.0040)  |
| Direct Import  |                      | -0.0985**<br>(0.0046) |
| Chain FE       | ✓                    | ✓                     |
| Time FE        | ✓                    | ✓                     |
| Number of obs. | 10,767               | 10,767                |
| Adj. R-sq      | 0.0859               | 0.1962                |
| Avg. FE        | 0.0551               | 0.0647                |

*Notes:* OLS estimates of a regression equation in which the dependent variable is *slotting & placement allowances* as a share of gross wholesale revenue. The sample includes only suppliers who do not introduce new SKUs in a given category-chain-period combination. *Groceries* is a dummy variable that takes the value of 1 if a supplier operates in a grocery category. Cluster-robust (at the supplier level) standard errors in parenthesis. P-values notation: \*\*\*  $p < 0.01$ , \*\*  $p < 0.05$ , \*  $p < 0.1$ .

## E. Private Label Sourcing

### E.1. Correlates of Allowance Payments by Dedicated PL Suppliers

**Table E.1** Probability of Making Allowance Payments  
Dedicated PL Suppliers

|                  |                        |
|------------------|------------------------|
| PL Margin        | -0.0363***<br>(0.0103) |
| Firm Size        | -0.0039<br>(0.0052)    |
| Groceries X Size | 0.1189***<br>(0.0243)  |
| Category FE      | ✓                      |
| Chain FE         | ✓                      |
| Time FE          | ✓                      |
| Number of obs.   | 2,770                  |
| Adj. R-sq        | 0.6267                 |

Notes: OLS estimates of a regression equation in which the dependent variable is a dummy variable taking the value of one if the dedicated supplier makes a payment of slotting & placement fees. Cluster-robust (at the supplier level) standard errors in parenthesis. P-values notation: \*\*\*  $p < 0.01$ , \*\*  $p < 0.05$ , \*  $p < 0.1$ .

**Table E.2 Slotting & Placement Allowances and PL Involvement**  
(% of gross supplier revenue)

|                      | All Suppliers<br>(1)   | Grocery Suppliers<br>(2) | All Suppliers<br>(3)   | Grocery Suppliers<br>(4) |
|----------------------|------------------------|--------------------------|------------------------|--------------------------|
| Dedicated PL         | -0.0963***<br>(0.0045) | -0.0916***<br>(0.0089)   | -0.0964***<br>(0.0045) | -0.0916***<br>(0.0089)   |
| Dual Brander         | -0.0358***<br>(0.0055) | -0.0353***<br>(0.0068)   | -0.0362***<br>(0.0065) | -0.0331***<br>(0.0089)   |
| Number of Categories | -0.0009***<br>(0.0003) | -0.0011***<br>(0.0003)   | -0.0009***<br>(0.0003) | -0.0011***<br>(0.0003)   |
| Direct Import        | -0.1125***<br>(0.0044) | -0.1200***<br>(0.0052)   | -0.1125***<br>(0.0044) | -0.1200***<br>(0.0052)   |
| Dual x Commodity     |                        |                          | 0.0015<br>(0.0099)     | -0.0064<br>(0.0116)      |
| Category FE          | ✓                      | ✓                        | ✓                      | ✓                        |
| Chain FE             | ✓                      | ✓                        | ✓                      | ✓                        |
| Time FE              | ✓                      | ✓                        | ✓                      | ✓                        |
| Number of Obs.       | 17,081                 | 11,001                   | 17,081                 | 11,001                   |
| Adjusted R-squared   | 0.4088                 | 0.3168                   | 0.4088                 | 0.3167                   |

Notes: Equation estimated by OLS. The dependent variable is the share of slotting & placement allowances in gross wholesale revenue. Dedicated PL is a dummy taking the value of one if the supplier only produces private labels; Dual Brander is a dummy taking the value of one if the supplier supplies both national brands and private labels; Number of Categories is the number of categories the supplier operates in; Direct Import is a dummy that takes the value of one if suppliers products in a given category are directly imported by the retailer; finally, Dual x Commodity is an interaction term between Dual Brander and a dummy taking the value of one if the category corresponds to a commodity category. Clustered standard errors in parentheses. p-values notation: \*  $p < 0.1$ , \*\*  $p < 0.05$ , \*\*\*  $p < 0.01$

## E.2. Commodity Categories

The following is a list of commodity categories for which the dummy variable *Commodity* in Equation (3) takes the value of one:

Bakery, Cooking Oil, Dried Fruit, Eggs, Flour, Fresh Seafood, Frozen Seafood, Frozen Vegetables, Fruits and Vegetables, Honey and Jam, Legumes, Milk UHT, Packaged Seafood, Pastries (packaged), Rice, Salt, Seasonings, Sugar, Vinegar.

### E.3. Share of PLs in Dual Brander Revenues

**Table E.3** Share of PL Revenue versus Commodity Categories

| Dual Brander Suppliers             |                        |
|------------------------------------|------------------------|
| Dep. Variable: Share of PL Revenue |                        |
| Commodity                          | -0.1826***<br>(0.0389) |
| Chain FE                           | ✓                      |
| Time FE                            | ✓                      |
| Number of Obs.                     | 931                    |
| Adj. R-sq                          | 0.0564                 |

Notes: OLS estimates of a regression equation in which the dependent variable is the share of PLs in total supplier revenue. *Commodity* is a dummy that takes the value of one if a category is identified as a commodity category (see Appendix E.2). Subsample of dual branders only. Cluster-robust (at the supplier level) standard errors in parenthesis. P-values notation: \*\*\*  $p < 0.01$ , \*\*  $p < 0.05$ , \*  $p < 0.1$ .

## F. Further Evidence on Cross-Category Interrelationships

### F.1. Cross-category Bivariate Correlation of Allowances

To provide further evidence on the extent to which our data are consistent with cross-category interrelationships, we examine how a given allowance type paid by a multi-category supplier comoves across the categories in which the supplier participates. For ease of exposition and relevance, we focus on the most important type of trade allowance in our data, namely *slotting & placement fees*.

Figure F.1 presents pairwise correlation coefficients between trade allowances paid by a multi-category supplier in a given category and its payments in other categories for the same chain-time combination.<sup>34</sup> Trade allowances are measured in logs. The height of each bar represents the correlation coefficient in a given category. Lighter bars indicate that the correlation coefficient is significantly different from zero at the 1 percent level.

We find that trade allowances paid by a supplier in a given chain-period tend to be positively correlated across categories. Conditional correlations of allowances are statistically significantly different from zero in 83 percent of categories at the 1 percent level. The average correlation coefficient is approximately equal to 0.71 among those categories for which correlations are statistically significant (at the 1 percent level).

<sup>34</sup>Each category-specific correlation coefficient is given by:

$$\rho_j = \frac{\text{cov}(a_{scjt}, a_{sc,-jt})}{\sqrt{\text{var}(a_{scjt}) \text{var}(a_{sc,-jt})}}$$

where  $a_{scjt}$  and  $a_{sc,-jt}$  are measures of trade allowances paid by the multi-category supplier  $s$  to chain  $c$  at time  $t$  in the category  $j$  and the other categories  $-j$ , respectively.

**Figure F.1** Cross-Category Correlations of Trade Allowances (*slotting & placement*, Multi-category Suppliers only)

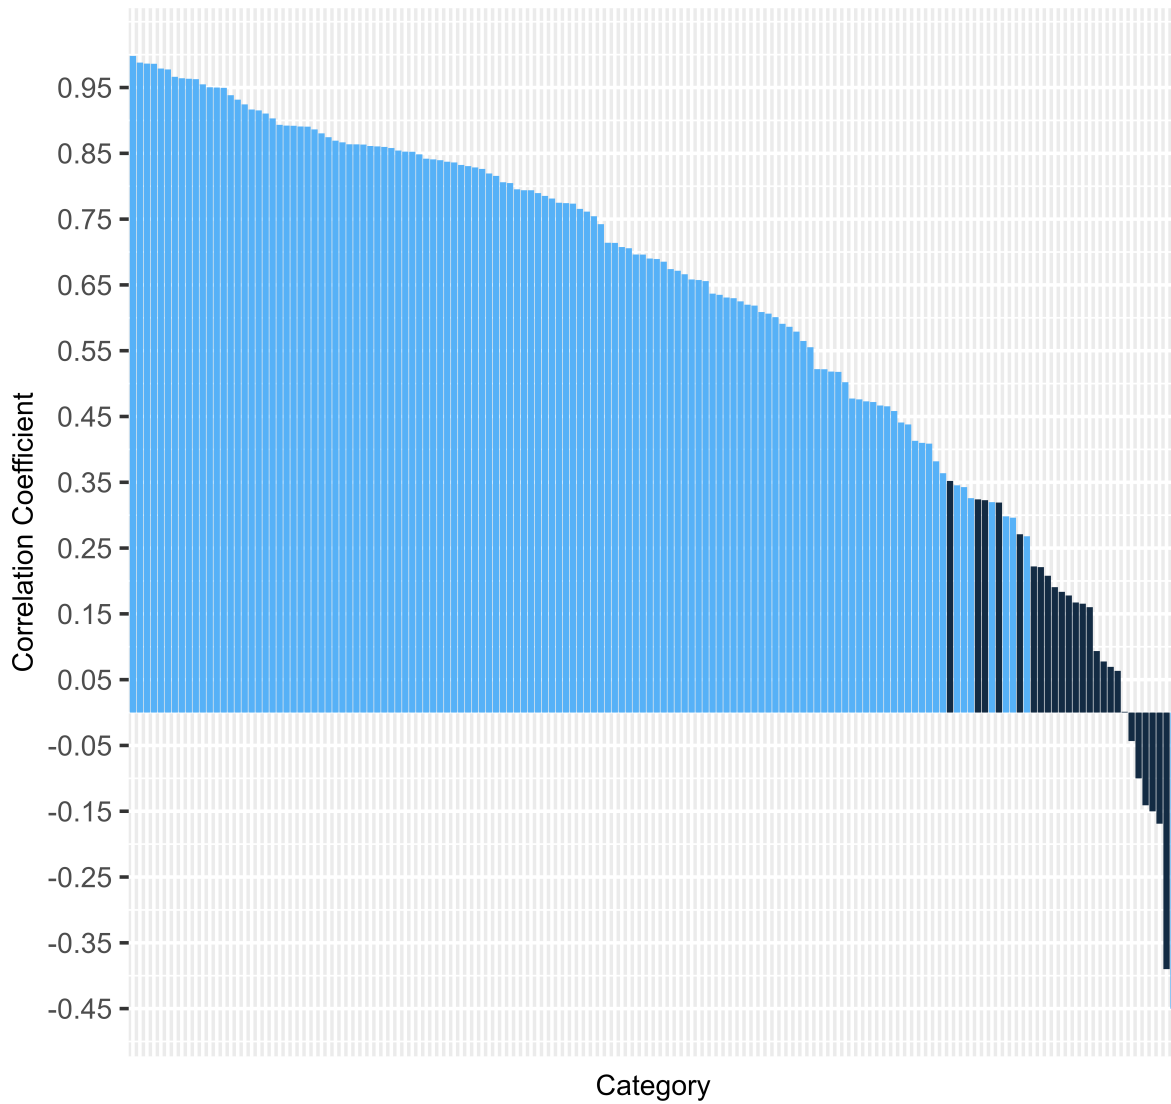

Notes: The figure shows the correlation coefficients at the category level between *slotting & placement allowances* (in logs) paid in a category by multi-category supplier and those paid in other categories using semi-annual time aggregation. Specifications include supplier, chain and time fixed effects. Sample restricted to multi-category suppliers (614 out of 1,571). Lighter bars denote statistically significant correlation coefficients (at the 1% level).

## F.2. Robustness Checks on Cross-Category Interrelationships

**Table F.1 Cross-Category Interrelationships**  
**Suppliers with Dissimilar Revenues/Market Shares Across Categories**

|                        | Revenue<br>(1)        | Market Share<br>(2)   |
|------------------------|-----------------------|-----------------------|
| Focal Allowances (log) | 0.9766***<br>(0.0685) | 0.9115***<br>(0.1108) |
| Category FE            | ✓                     | ✓                     |
| Chain FE               | ✓                     | ✓                     |
| Time FE                | ✓                     | ✓                     |
| Number of Obs.         | 150                   | 156                   |
| Adj. R.sq              | 0.8981                | 0.8796                |

Notes: OLS estimates of Equation (4) for the subsample of multi-category suppliers whose revenue (Column (1)) or market share (Column (2)) volatility across categories (measured by the coefficient of variation) is above the 67th percentile. The dependent variable is the level of slotting & placement fees in non-focal categories (in logs). All specifications include category, chain, and time-fixed effects using semi-annual time aggregation. Cluster-robust (at the supplier level) standard errors in parenthesis. P-values notation: \*\*\*  $p < 0.01$ , \*\*  $p < 0.05$ , \*  $p < 0.1$ .

**Table F.2 Cross-Category Interrelationships**  
**Suppliers Operating in Food and Non-food Categories**

|                        |                       |
|------------------------|-----------------------|
| Focal Allowances (log) | 0.9431***<br>(0.0497) |
| Category FE            | ✓                     |
| Chain FE               | ✓                     |
| Time FE                | ✓                     |
| Number of Obs.         | 256                   |
| Adj. R.sq              | 0.9028                |

Notes: OLS estimates of Equation (4) for the subsample of suppliers that operate in both food and non-food categories. The dependent variable is the level of *slotting & placement fees* in non-focal categories (in logs). All specifications include category, chain, and time-fixed effects using semi-annual time aggregation. Cluster-robust (at the supplier level) standard errors in parenthesis. P-values notation: \*\*\*  $p < 0.01$ , \*\*  $p < 0.05$ , \*  $p < 0.1$ .

## G. Relationship between Allowances and Spot Contracts

**Table G.1** Frequency of Price Promotions and Spot Contract Allowances

| <b>Panel A: Retail Price Promotions</b>    |                        |                        |                        |                        |
|--------------------------------------------|------------------------|------------------------|------------------------|------------------------|
|                                            | (1)                    | (2)                    | (3)                    | (4)                    |
| Allowances in t (log)                      | -0.0026*<br>(0.0014)   |                        | -0.0030*<br>(0.0018)   |                        |
| Allowances in t-1 (log)                    |                        | -0.0043**<br>(0.0017)  |                        | -0.0037**<br>(0.0017)  |
| Firm Size in t-1 (log)                     |                        |                        | -0.0036<br>(0.0025)    | -0.0033<br>(0.0025)    |
| Category FE                                | ✓                      | ✓                      | ✓                      | ✓                      |
| Chain FE                                   | ✓                      | ✓                      | ✓                      | ✓                      |
| Time FE                                    | ✓                      | ✓                      | ✓                      | ✓                      |
| Number of Obs.                             | 10,895                 | 8,031                  | 8,031                  | 8,031                  |
| Adj. R-sq                                  | 0.1637                 | 0.1652                 | 0.1651                 | 0.1655                 |
| <b>Panel B: Wholesale Price Promotions</b> |                        |                        |                        |                        |
|                                            | (1)                    | (2)                    | (3)                    | (4)                    |
| Allowances in t (log)                      | -0.0054***<br>(0.0014) |                        | -0.0036***<br>(0.0014) |                        |
| Allowances in t-1 (log)                    |                        | -0.0053***<br>(0.0014) |                        | -0.0036***<br>(0.0014) |
| Firm Size in t-1 (log)                     |                        |                        | -0.0099***<br>(0.0020) | -0.0099***<br>(0.0020) |
| Category FE                                | ✓                      | ✓                      | ✓                      | ✓                      |
| Chain FE                                   | ✓                      | ✓                      | ✓                      | ✓                      |
| Time FE                                    | ✓                      | ✓                      | ✓                      | ✓                      |
| Number of Obs.                             | 10,916                 | 8,051                  | 8,051                  | 8,051                  |
| Adj. R-sq                                  | 0.2751                 | 0.2732                 | 0.2827                 | 0.2827                 |

*Notes:* OLS estimates of Equation (6). The dependent variable is a log transformation of the frequency of price promotions. In Panel A (B) frequencies of price promotions are based on retail (wholesale) prices. Allowances correspond to those negotiated in spot contracts. All specifications include category, chain, and time-fixed effects using semi-annual time aggregation. Cluster-robust (at the supplier level) standard errors in parenthesis. P-values notation: \*\*\*  $p < 0.01$ , \*\*  $p < 0.05$ , \*  $p < 0.1$ .

## H. Robustness Checks on the Relationship between Prices and Allowances

**Table H.1 Relationship between Prices and Allowances**  
**Food Categories**

|                                   | Retail Price          |                       | Wholesale Price       |                       | Retail Margin          |                        |
|-----------------------------------|-----------------------|-----------------------|-----------------------|-----------------------|------------------------|------------------------|
|                                   | (1)                   | (2)                   | (3)                   | (4)                   | (5)                    | (6)                    |
| Slotting & Placement in t (log)   | 0.0218***<br>(0.0051) |                       | 0.0253***<br>(0.0052) |                       | -0.0035***<br>(0.0012) |                        |
| Slotting & Placement in t-1 (log) |                       | 0.0198***<br>(0.0052) |                       | 0.0231***<br>(0.0052) |                        | -0.0033***<br>(0.0011) |
| Supplier FE                       | ✓                     | ✓                     | ✓                     | ✓                     | ✓                      | ✓                      |
| Category FE                       | ✓                     | ✓                     | ✓                     | ✓                     | ✓                      | ✓                      |
| Chain FE                          | ✓                     | ✓                     | ✓                     | ✓                     | ✓                      | ✓                      |
| Number of Obs.                    | 8,223                 | 5,719                 | 8,223                 | 5,719                 | 8,223                  | 5,719                  |
| Adj. R-sq                         | 0.8388                | 0.8486                | 0.8362                | 0.8462                | 0.6759                 | 0.7211                 |

*Notes:* OLS estimates of Equation (7) for the subsample of suppliers operating in food categories. In Columns (1) and (2), the dependent variable is the weighted average retail price (in logs). In Columns (3) and (4), the dependent variable is the weighted average wholesale price (in logs). In columns (5) and (6) the dependent variable is the retail margin, defined as the difference between the log-weighted average retail price and the log-weighted average wholesale price. All specifications include supplier, category, and chain fixed effects using semi-annual time aggregation. Cluster-robust (at the supplier level) standard errors in parenthesis. P-values notation: \*\*\*  $p < 0.01$ , \*\*  $p < 0.05$ , \*  $p < 0.1$ .

**Table H.2 Relationship between Prices and Allowances  
 Suppliers with High New Product Introduction Activity**

|                                   | Retail Price          |                       | Wholesale Price       |                       | Retail Margin      |                     |
|-----------------------------------|-----------------------|-----------------------|-----------------------|-----------------------|--------------------|---------------------|
|                                   | (1)                   | (2)                   | (3)                   | (4)                   | (5)                | (6)                 |
| Slotting & Placement in t (log)   | 0.0237***<br>(0.0048) |                       | 0.0230***<br>(0.0050) |                       | 0.0007<br>(0.0016) |                     |
| Slotting & Placement in t-1 (log) |                       | 0.0279***<br>(0.0044) |                       | 0.0287***<br>(0.0044) |                    | -0.0008<br>(0.0012) |
| Supplier FE                       | ✓                     | ✓                     | ✓                     | ✓                     | ✓                  | ✓                   |
| Category FE                       | ✓                     | ✓                     | ✓                     | ✓                     | ✓                  | ✓                   |
| Chain FE                          | ✓                     | ✓                     | ✓                     | ✓                     | ✓                  | ✓                   |
| Number of Obs.                    | 5,994                 | 4,297                 | 5,994                 | 4,297                 | 5,994              | 4,297               |
| Adj. R-sq                         | 0.8832                | 0.8869                | 0.8989                | 0.9091                | 0.6128             | 0.6109              |

Notes: OLS estimates of Equation (7) for the subsample of suppliers operating in food categories. In Columns (1) and (2), the dependent variable is the weighted average retail price (in logs). In Columns (3) and (4), the dependent variable is the weighted average wholesale price (in logs). In columns (5) and (6) the dependent variable is the retail margin, defined as the difference between the log-weighted average retail price and the log-weighted average wholesale price. All specifications include supplier, category, and chain fixed effects using semi-annual time aggregation. Cluster-robust (at the supplier level) standard errors in parenthesis. P-values notation: \*\*\* p<0.01, \*\* p<0.05, \* p<0.1.
